# Supplementary material for: A Molecular Mechanism for Eflornithine Resistance in African Trypanosomes
Source: PLoS Pathog. 2010 Nov 24;6(11):e1001204. doi: 10.1371/journal.ppat.1001204 (PMC2991269; doi:10.1371/journal.ppat.1001204)
Supplement: Table S1 — Retention times on the HILIC column along with ratios and p values are shown for each detected metabolite. (0.06 MB XLS) [file ppat.1001204.s003.xls]

## Sheet: table (2)
	Metabolies detected in wildtype and eflornithine resistant cell extracts
Pathway	Putative metabolite	Isomer	Formula	Detected m/z	Polarity	RT (m)	RvsWT	pvalue	WT	WTsd	RT	RTsd	CM_WT	CM_WTsd	CM_RT	CM_RTsd
polyamine and trypanothione biosynthesis	5'-Methylthioadenosine		C11H15N5O3S	298.097	+	8.1	1.33	0.34	523.509	161.567	697.24	220.315	124	70	143	29
polyamine and trypanothione biosynthesis	glutathionylspermidine		C17H34N6O5S	435.238	+	32.25	0.760864	0.614572	7.42533	5.0471	5.64967	1.89005	4	2	5	3
polyamine and trypanothione biosynthesis	L-Ornithine		C5H12N2O2	133.098	+	21.98	0.52	0.47	75.777	70.0818	39.214	25.1223	8	3	8	3
polyamine and trypanothione biosynthesis	N-acetylglutamate semialdehyde		C7H11NO4	174.075	+	10.07	1	0.98	801.464	70.625	805.131	199.053	24	1	23	2
polyamine and trypanothione biosynthesis	N-Acetylornithine		C7H14N2O3	175.108	+	14.16	0.9	0.81	123.44	77.656	110.53	29.4292	61	9	82	9
polyamine and trypanothione biosynthesis	Putrescine		C4H12N2	89.1073	+	29.82	0.91	0.5	398.54	32.4335	361.106	76.1119	45	18	50	9
polyamine and trypanothione biosynthesis	S-Adenosyl-L-methionine		C15H22N6O5S	399.146	+	25.13	1.06	0.9	11.659	3.9519	12.397	8.20345	92	40	98	30
polyamine and trypanothione biosynthesis	Spermidine		C7H19N3	146.165	+	41.61	1.05	0.86	1301.25	330.265	1361.16	436.698	23.3	5.7	29.4	17.6
polyamine and trypanothione biosynthesis	Trypanothione disulfide		C27H47N9O10S2	722.295	+	23.15	1.01	0.97	86.742	16.6511	87.571	34.7052	62	21	60	13
Amino Acid Metabolism	3-Methyl-2-oxobutanoic acid		C5H8O3	115.04	-	6.07	1.04	0.94	1172.35	542.271	1217.77	817.175	3	2	8	2
Amino Acid Metabolism	4-Aminobutanoate		C4H9NO2	102.056	-	14.03	1.19	0.63	371.868	127.687	442.157	191.854	30	21	61	56
Amino Acid Metabolism	4-Trimethylammoniobutanoate		C7H15NO2	146.118	+	9.21	1.02	0.92	102.057	23.8291	104.338	26.3918	10	3	8	3
Amino Acid Metabolism	8-Methoxykynurenate		C11H9NO4	218.046	-	10.01	0.87	0.6	20.715	2.97468	17.999	7.41297	7	2	6	1
Amino Acid Metabolism	Adenine		C5H5N5	136.062	+	11.72	0.98	0.96	2422.93	1241.87	2377.81	1110.05	109	19	112	32
Amino Acid Metabolism	Anthranilate		C7H7NO2	138.055	+	14	0.22	0.01	321.54	41.3198	69.529	2.14492	51	27	10	8
Amino Acid Metabolism	Benzoate		C7H6O2	123.044	+	6.48	1.34	0.26	11.347	1.85803	15.211	4.31004	5	1	7	2
Amino Acid Metabolism	Carnitine		C7H15NO3	162.112	+	13.54	1.19	0.58	1110.89	476.671	1318.33	337.012	1060	505	1217	437
Amino Acid Metabolism	Choline phosphate		C5H14NO4P	184.073	+	19.66	1.44	0.29	1571.67	343.873	2269.74	860.776	874	450	1234	325
Amino Acid Metabolism	CMP-N-trimethyl-2-aminoethylphosphonate		C14H26N4O10P2	473.12	+	20.1	1.12	0.54	46.87	12.342	52.309	4.93257	70	8	64	11
Amino Acid Metabolism	D-Glucosamine 6-phosphate		C6H14NO8P	258.038	-	15.84	1.7	0.09	22.537	2.28408	38.237	9.22352	94	18	104	14
Amino Acid Metabolism	Glutathione		C10H17N3O6S	308.091	+	13.19	1.18	0.79	5.639	3.44078	6.627	1.48419	1120	621	997	580
Amino Acid Metabolism	Imidazole-4-acetaldehyde		C5H6N2O	111.055	+	16.5	1.44498	0.211718	18.7813	3.97397	27.1387	8.14908	5	2	8	3
Amino Acid Metabolism	L-Arginine phosphate		C6H15N4O5P	255.085	+	19.77	1.16	0.75	176.727	92.9164	204.494	103.507	429	132	566	167
Amino Acid Metabolism	L-Cystathionine		C7H14N2O4S	223.075	+	18.72	1.13	0.4	105.206	13.7241	118.406	19.7472	197	98	321	267
Amino Acid Metabolism	N4-Acetylaminobutanal		C6H11NO2	130.087	+	11.21	0.91	0.27	81.824	6.74037	74.535	7.34857	39	43	35	30
Amino Acid Metabolism	N-acetyl-D-glucosamine-6-phosphate	*	C8H16NO9P	324.046	+	14.99	1.29	0.49	25.669	6.67824	33.174	15.0232	80	14	87	21
Amino Acid Metabolism	O-Acetylcarnitine		C9H17NO4	204.123	+	11.11	1.19	0.54	159.512	20.3885	189.613	69.3904	381	149	603	29
Amino Acid Metabolism	Phenylpyruvate		C9H8O3	163.04	-	5.52	0.87	0.42	1527.27	186.387	1331.48	314.905	9	5	5	5
Amino Acid Metabolism	trans-4-Hydroxy-L-proline	*	C5H9NO3	132.066	+	14.23	0.75	0.24	146.804	30.7685	110.057	33.9283	74	22	42	10
Carbohydrate Metabolism	(R)-Lactate	*	C3H6O3	89.0243	-	6.67	1.15	0.53	110.164	14.8482	126.674	36.8561	23	23	49	21
Carbohydrate Metabolism	(S)-Malate		C4H6O5	133.014	-	8.43	1.19	0.67	231.877	111.706	276.563	128.903	26	8	20	6
Carbohydrate Metabolism	2-Oxoglutarate		C5H6O5	145.014	-	8.57	1.42	0.61	624.403	447.489	885.035	664.183	11	10	9	8
Carbohydrate Metabolism	citrate	*	C6H8O7	191.02	-	9.4	0.97	0.69	54.102	3.36056	52.56	5.17397	2	2	5	9
Carbohydrate Metabolism	D-glucose-6-phosphate	*	C6H13O9P	283.018	+	17.54	1.13	0.48	27.519	7.01197	31.031	0.50664	168	45	222	88
Carbohydrate Metabolism	D-Ribose		C5H10O5	149.046	-	9.99	1.18	0.56	112.533	17.9481	132.26	48.1425	2	2	11	4
Carbohydrate Metabolism	D-Xylulose 5-phosphate	*	C5H11O8P	229.012	-	15.68	0.62	0.56	31.927	29.6715	19.952	8.80071	11	7	3	3
Carbohydrate Metabolism	Fumarate		C4H4O4	115.004	-	8.36	1.13	0.79	56.012	29.7994	63.07	31.0057	6	2	4	2
Carbohydrate Metabolism	Glycerol		C3H8O3	93.0546	+	9.67	1.1	0.59	1347.34	182.32	1477.82	328.667	2.4	2.3	3.7	1
Carbohydrate Metabolism	L-Arabinono-1-5-lactone		C5H8O5	149.045	+	7.4	0.94	0.83	53.445	14.7887	50.492	16.1959	16	11	12	11
Carbohydrate Metabolism	L-Gulonate	*	C6H12O7	195.051	-	9.99	1.17	0.64	43.302	3.61885	50.522	22.8448	9	5	16	2
Carbohydrate Metabolism	Succinate		C4H6O4	117.019	-	6.67	1.41	0.35	1376.27	776.142	1935.05	399.485	169	89	138	12
Carbohydrate Metabolism	sucrose	*	C12H22O11	341.109	-	13.69	0.89	0.3	87.458	9.50874	78.159	9.60966	863	411	1069	760
Energy Metabolism	NAD+		C21H27N7O14P2	686.098	+	16.48	1.09	0.64	10.45	1.80817	11.374	2.56166	27	6	26	8
Lipid Metabolism	(R)-3-Hydroxybutanoate		C4H8O3	103.04	-	7.35	0.77	0.39	96.93	34.4222	74.722	16.1022	3	3	8	3
Lipid Metabolism	Acetoacetate	*	C4H6O3	101.024	-	8.57	1.39	0.62	390.761	273.364	544.99	410.83	120	62	134	51
Lipid Metabolism	sn-glycero-3-Phosphocholine		C8H20NO6P	280.092	+	17.4	1.24	0.31	8224.64	1658.69	10194.7	2370.84	18460	3299	26176	3961
Lipid Metabolism	sn-glycero-3-Phosphoethanolamine		C5H14NO6P	238.045	+	15.69	3.04	0.26	184.03	24.3603	559.097	420.091	1439	1231	1729	1471
Lipid Metabolism	sn-Glycerol 3-phosphate		C3H9O6P	171.006	-	15.3	1.11	0.39	16855.2	2616.11	18707.4	2077.83	35	7	40	11
Medium component	Choline		C5H13NO	104.107	+	14.33	1.47	0.44	21503	9813.68	31657.9	17553	2078	781	1992	873
Medium component	D-glucose	*	C6H12O6	203.052	+	12.98	1.19	0.61	434.041	208.564	517.424	148.076	22	9	26	8
Medium component	Folate		C19H19N7O6	442.148	+	9.05	1.05	0.77	218.348	27.8601	229.157	52.5909	190	19	193	8
Medium component	Hypoxanthine		C5H4N4O	137.046	+	9.05	1.15	0.38	56985.7	5514.9	65670.1	13145.4	13884	41	14686	1189
Medium component	Nicotinamide	*	C6H6N2O	123.056	+	8.03	1.11	0.61	1418.41	190.671	1575.05	426.126	216	58	245	29
Medium component	Orthophosphate		H3O4P	98.9845	+	15.25	1.26	0.71	80.501	32.7932	101.398	79.8993	495	218	387	174
Medium component	Pantothenate		C9H17NO5	220.118	+	6.64	1.34	0.35	853.514	70.1827	1145.7	423.428	79	11	88	28
Medium component	Phenol Red		C19H14O5S	355.064	+	5.72	1.04	0.88	3344.05	749.155	3490.07	1406.78	47	4	52	16
Medium component	Pyridoxal		C8H9NO3	168.065	+	11.72	1.17	0.58	551.058	94.8272	647.234	243.808	15.7	2.5	12.8	3.1
Medium component	Pyruvate		C3H4O3	87.0087	-	7.56	1.03	0.9	7542.1	979.159	7794.64	3000.3	251	95	208	48
Medium component	riboflavin		C17H20N4O6	377.145	+	7.55	1	0.99	69.444	22.1194	69.667	26.5314	149	4	166	13
Medium component	Thiamine		C12H16N4OS	265.112	+	23.08	1.37	0.63	1859.19	992.292	2539.05	1949.71	238	55	235	37
Medium component	Thymidine		C10H14N2O5	241.083	-	7.09	0.85	0.82	149.361	110.658	127.356	111.151	12	4	31	3
Medium component - amino acid	Glycine		C2H5NO2	76.0395	+	15.32	1.18	0.7	1438.24	1009.69	1697.44	180.074	37	8	25	4
Medium component - amino acid	L-Alanine		C3H7NO2	90.055	+	14.23	1.22	0.64	70090.9	8049.83	85200.9	48224.6	780	164	576	103
Medium component - amino acid	L-Arginine		C6H14N4O2	175.119	+	21.27	1.12	0.66	15234.6	1185.15	16991.8	5865.33	3020	712	2749	877
Medium component - amino acid	L-Asparagine		C4H8N2O3	133.061	+	15.62	1.26	0.79	654.831	782.738	823.859	681.837	255	103	175	59
Medium component - amino acid	L-Aspartate		C4H7NO4	134.045	+	14.54	1.47	0.35	399.858	82.1981	586.452	267.921	249	65	348	32
Medium component - amino acid	L-Cysteine		C3H7NO2S	122.027	+	13.77	1.04	0.9	69.782	13.6198	72.591	31.9	240	73	307	100
Medium component - amino acid	L-Cystine		C6H12N2O4S2	241.031	+	18.83	1.27	0.67	204.439	41.0452	258.633	186.331	452	267	536	134
Medium component - amino acid	L-Glutamate		C5H9NO4	148.06	+	14.07	1.6	0.47	12005	4459.17	19255.2	14177.7	2270	1721	3322	2861
Medium component - amino acid	L-Glutamine		C5H10N2O3	147.077	+	15.13	1.18	0.32	45949.1	9107.03	54379.4	8960.73	993	109	1041	97
Medium component - amino acid	L-Histidine		C6H9N3O2	156.077	+	20.4	1.14	0.62	6667.37	938.872	7592.42	2696.07	373	8	368	22
Medium component - amino acid	L-isoleucine	*	C6H13NO2	132.102	+	10.63	1.1	0.16	61076.8	5031.74	67408.9	3398.83	2230	582	2386	330
Medium component - amino acid	L-Leucine	*	C6H13NO2	132.102	+	11.01	1.12	0.13	62113	3927.29	69326	5241.22	2768	615	3102	361
Medium component - amino acid	L-Lysine		C6H14N2O2	147.113	+	21.54	1.15	0.41	15797.3	870.55	18168.8	3980.85	408	137	451	79
Medium component - amino acid	L-Methionine		C5H11NO2S	150.058	+	11.51	1.1	0.16	16087.8	926.504	17713.2	1297.18	510	100	547	67
Medium component - amino acid	L-Phenylalanine		C9H11NO2	166.086	+	10.12	1.29	0.41	23713.4	10449.2	30499.7	6701.79	3209	517	3525	336
Medium component - amino acid	L-Proline		C5H9NO2	116.071	+	13.77	0.93	0.71	20439.4	1912.81	18966.2	5749.62	4105	1347	1783	558
Medium component - amino acid	L-Serine		C3H7NO3	106.05	+	15.13	1.3	0.58	1977.52	943.989	2573.66	1399.16	399	118	273	68
Medium component - amino acid	L-Threonine	*	C4H9NO3	120.066	+	14.44	1.15	0.53	21012.3	1797.23	24218.6	7360.97	1744	689	1358	555
Medium component - amino acid	L-Tryptophan		C11H12N2O2	205.097	+	10.56	1.16	0.22	6120.72	147.013	7118.88	993.739	912	113	920	74
Medium component - amino acid	L-Tyrosine		C9H11NO3	182.081	+	12.21	0.97	0.3	26321.9	918.017	25563.7	556.017	2820	555	3166	262
Medium component - amino acid	L-Valine		C5H11NO2	118.086	+	12.4	1.13	0.13	49694.6	1108.26	56337.3	4685.19	1009	303	1058	191
Metabolism of Cofactors and Vitamins	Nicotinate		C6H5NO2	124.04	+	7.38	1.19	0.74	284.131	150.267	337.769	210.695	0.3	0.5	1	0.9
Metabolism of Cofactors and Vitamins	N-Ribosylnicotinamide		C11H14N2O5	255.097	+	14.44	0.55	0.44	21.97	9.0561	12.169	18.3056	1.5	0.35	3	1.5
Metabolism of Cofactors and Vitamins	ubiquinone-8		C49H74O4	727.57	+	7.68	0.91	0.69	12.978	4.12348	11.856	1.03857	7.1	5.2	3.6	3.9
Nucleotide Metabolism	3',5'-Cyclic AMP		C10H12N5O6P	330.06	+	15.94	0.77612	0.262248	28.4363	6.52574	22.07	5.28659	16	1	9	1
Nucleotide Metabolism	Adenosine		C10H13N5O4	268.103	+	10.32	0.67	0.39	83.962	40.9773	56.326	25.9057	31	14	16	3
Nucleotide Metabolism	AMP	*	C10H14N5O7P	348.071	+	15.3	1.73	0.62	173.811	96.823	300.914	376.678	667	343	644	399
Nucleotide Metabolism	dTMP		C10H15N2O8P	321.049	-	12.15	1.03	0.96	22.949	14.1898	23.58	17.5377	2	3	11	3
Nucleotide Metabolism	Guanine		C5H5N5O	152.056	+	11.9	0.7	0.01	494.108	33.9563	344.557	36.3406	140	71	118	53
Nucleotide Metabolism	IMP		C10H13N4O8P	347.039	-	14.99	1.14	0.76	29.36	4.57877	33.536	20.4373	9	3	7	1
Nucleotide Metabolism	UMP	*	C9H13N2O9P	323.028	-	14.61	0.96	0.92	73.944	26.187	71.076	34.7647	78	42	83	59
Nucleotide Metabolism	Uracil		C4H4N2O2	113.035	+	7.62	1.22	0.64	388.796	96.0662	474.431	262.066	27	1	23	5
Nucleotide Metabolism	Uridine		C9H12N2O6	243.062	-	10.6	0.96	0.86	65.347	14.6953	62.971	17.251	22	4	19	1
Nucleotide Metabolism	Xanthine		C5H4N4O2	153.041	+	8.54	1.15	0.64	1741.37	94.757	1997.98	824.744	328	37	396	70
Putative metabolite identification based on accurate mass match in KEGG (tbr) and/or trypanocyc databases
Common fragments, adducts and false identifications have been removed from putative identification list based on retention time and reproducibility. However, no further studies have been conducted to confirm the putative identities.
Isomer column indicates that isomers are present in KEGG(tbr) and/or trypanocyc databases, only one possible identity is listed here, except for (iso)leucine where 2 peaks were observed.
CM_refers to results from chloroform/methanol extraction method, otherwise results refer to boiling ethanol extraction method.
